# Supplementary material for: Donor–acceptor random regioregular π-conjugated copolymers based on poly(3-hexylthiophene) with unsymmetrical monothienoisoindigo units
Source: Royal Society of Chemistry journal article supplement (doi:10.1039/d0ra03557b), 2020-01-01
Supplement: d0ra03557b1.pdf [file d0ra03557b1.pdf]

Supporting Information

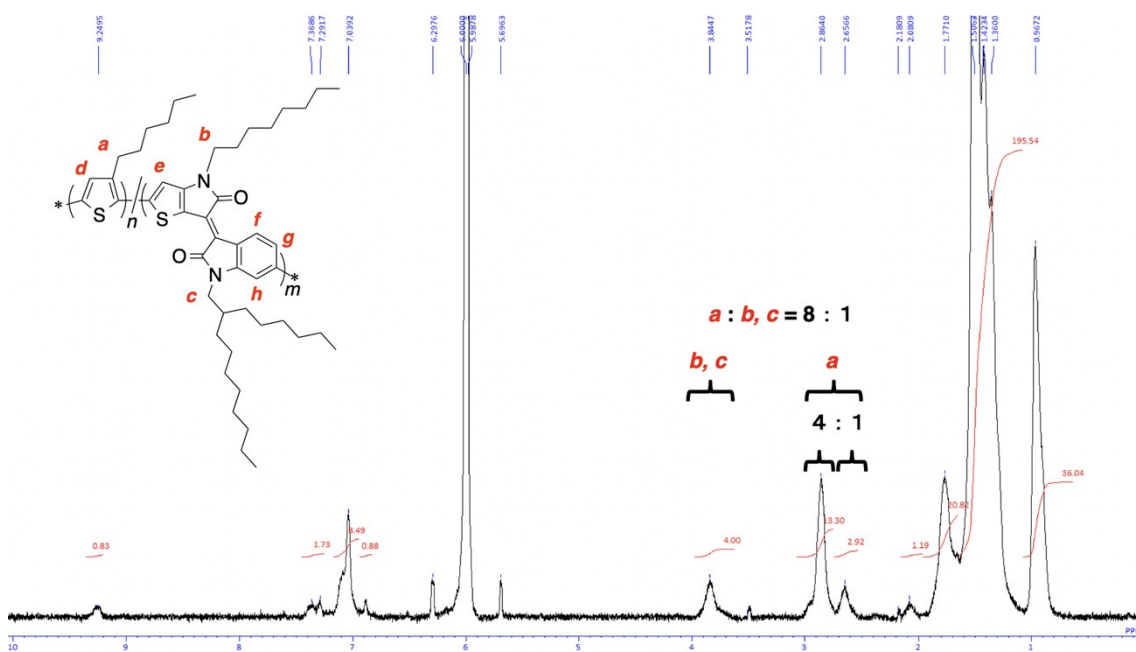

Fig. S1 <sup>1</sup>H NMR spectrum of P(3HT-ran-uTIIa).

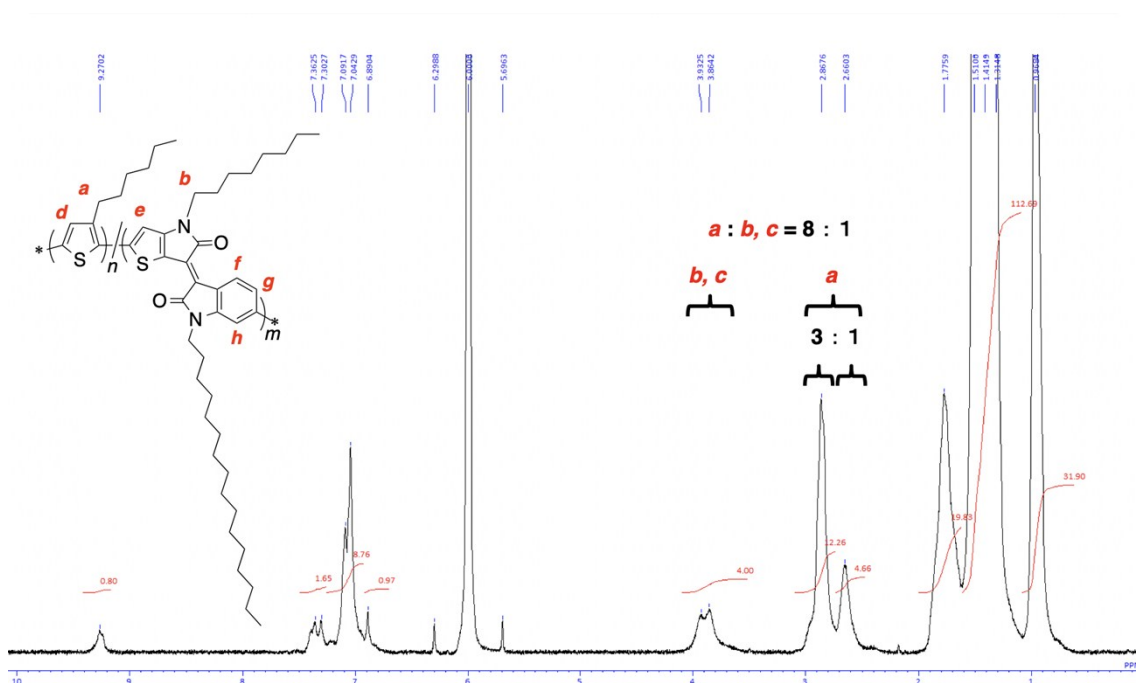

Fig. S2 <sup>1</sup>H NMR spectrum of P(3HT-ran-uTIIb).

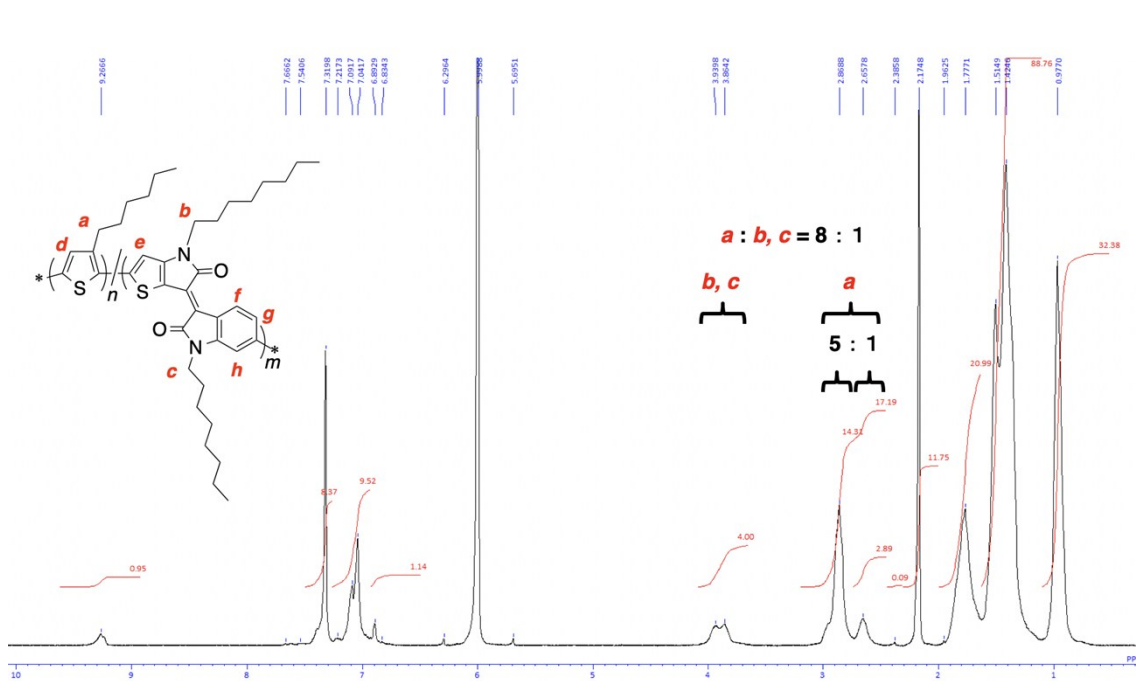

Fig. S3 <sup>1</sup>H NMR spectrum of P(3HT-ran-uTIIc).

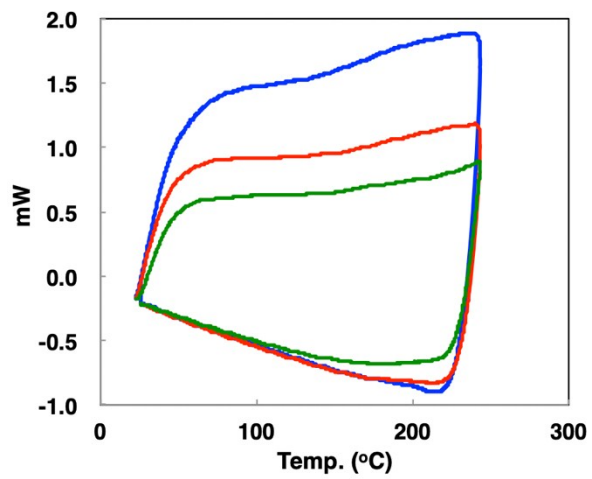

Fig. S4 DSC traces of the polymers.

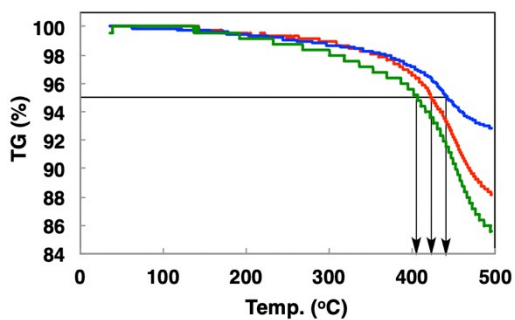

Fig. S5. TGA data of the polymers.

Table S1. Electrochemical properties of the polymers

| Polymer                        | Anodic peaks (V) | Cathodic peaks (V) |
|--------------------------------|------------------|--------------------|
| <b>P3HT</b>                    | 0.31, 0.73       | –                  |
| <b>P(3HT-<i>ran</i>-uTIIa)</b> | 0.42, 0.69       | –1.07              |
| <b>P(3HT-<i>ran</i>-uTIIb)</b> | 0.39, 0.72       | –4.03              |
| <b>P(3HT-<i>ran</i>-uTIIc)</b> | 0.48, 0.60       | –1.30              |

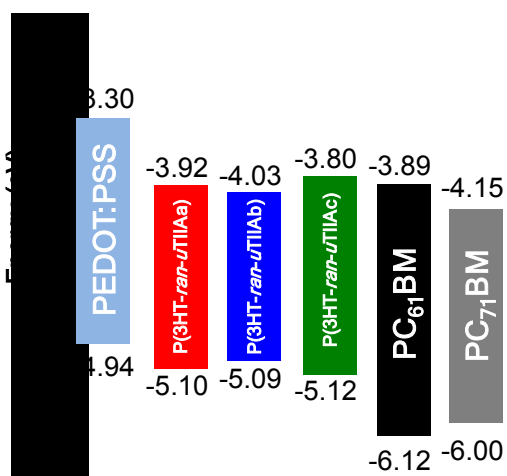

Fig. S6 Energy levels of the polymers.

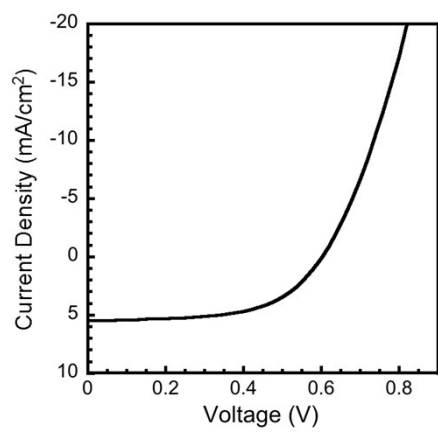

Fig. S7 IV curve of the devices.
